# Supplementary material for: Itinerant ferromagnetic half metallic cobalt–iron couples: promising bifunctional electrocatalysts for ORR and OER
Source: Royal Society of Chemistry journal article supplement (doi:10.1039/c9ta08616a), 2019-01-01
Supplement: c9ta08616a1.pdf [file c9ta08616a1.pdf]

## Supporting Information

### **Title: Itinerant ferromagnetic half metallic Iro-Cobalt couple: promising bifunctional electrocatalysts for ORR and OER**

*Yuling Sun, Jing Wang,\* Qian Liu, Meirong Xia, Yongfu Tang, Faming Gao, Yanglong Hou, John Tse\* Yufeng Zhao\**

This file includes following contents.

**Figure S1.** The most stable adsorption configurations of  $*O_2$ ,  $*OOH$ ,  $*O$ , and  $*OH$  on  $FeCoN_x$ -gra ( $x = 1 - 6$ ),  $CoN_4$ -gra,  $CoCoN_6$ -gra,  $FeFeN_6$ -gra and  $FeN_4$ -gra.

**Figure S2.** The scaling relations of  $\Delta G_{*OOH}$  vs.  $\Delta G_{*OH}$  and  $\Delta G_{*O}$  vs.  $\Delta G_{*OH}$  associated with various types of  $FeCoN_x$ -Gra sites.

**Figure S3.** The energy barriers and reaction energy for  $CoN_4$ -gra,  $FeFe-N_6$ -gra,  $FeCo-N_4$ -gra(III) and  $FeCo-N_5$ -gra(I) in unit of eV. \* denotes that the ORR species are adsorbed on the catalyst surface.

**Figure S4.** The free energy diagrams of OER and ORR for all architectures concerned. The blue and the red dot lines are the rate limiting step for ORR and OER, respectively.

**Table S1.**  $O_2$  adsorption energy ( $\Delta E_{ads}$ , in eV) and the bond length(in Å) of O-O, Fe-O and Co-O of  $FeCoN_x$ -gra ( $x = 1 - 6$ ),  $CoN_4$ -gra,  $CoCoN_6$ -gra,  $FeFeN_6$ -gra and  $FeN_4$ -gra.

**Table S2.** Spin moment ( $\mu_B$ ) of transition metals in  $FeCoN_x$ -gra ( $x = 1 - 6$ ).

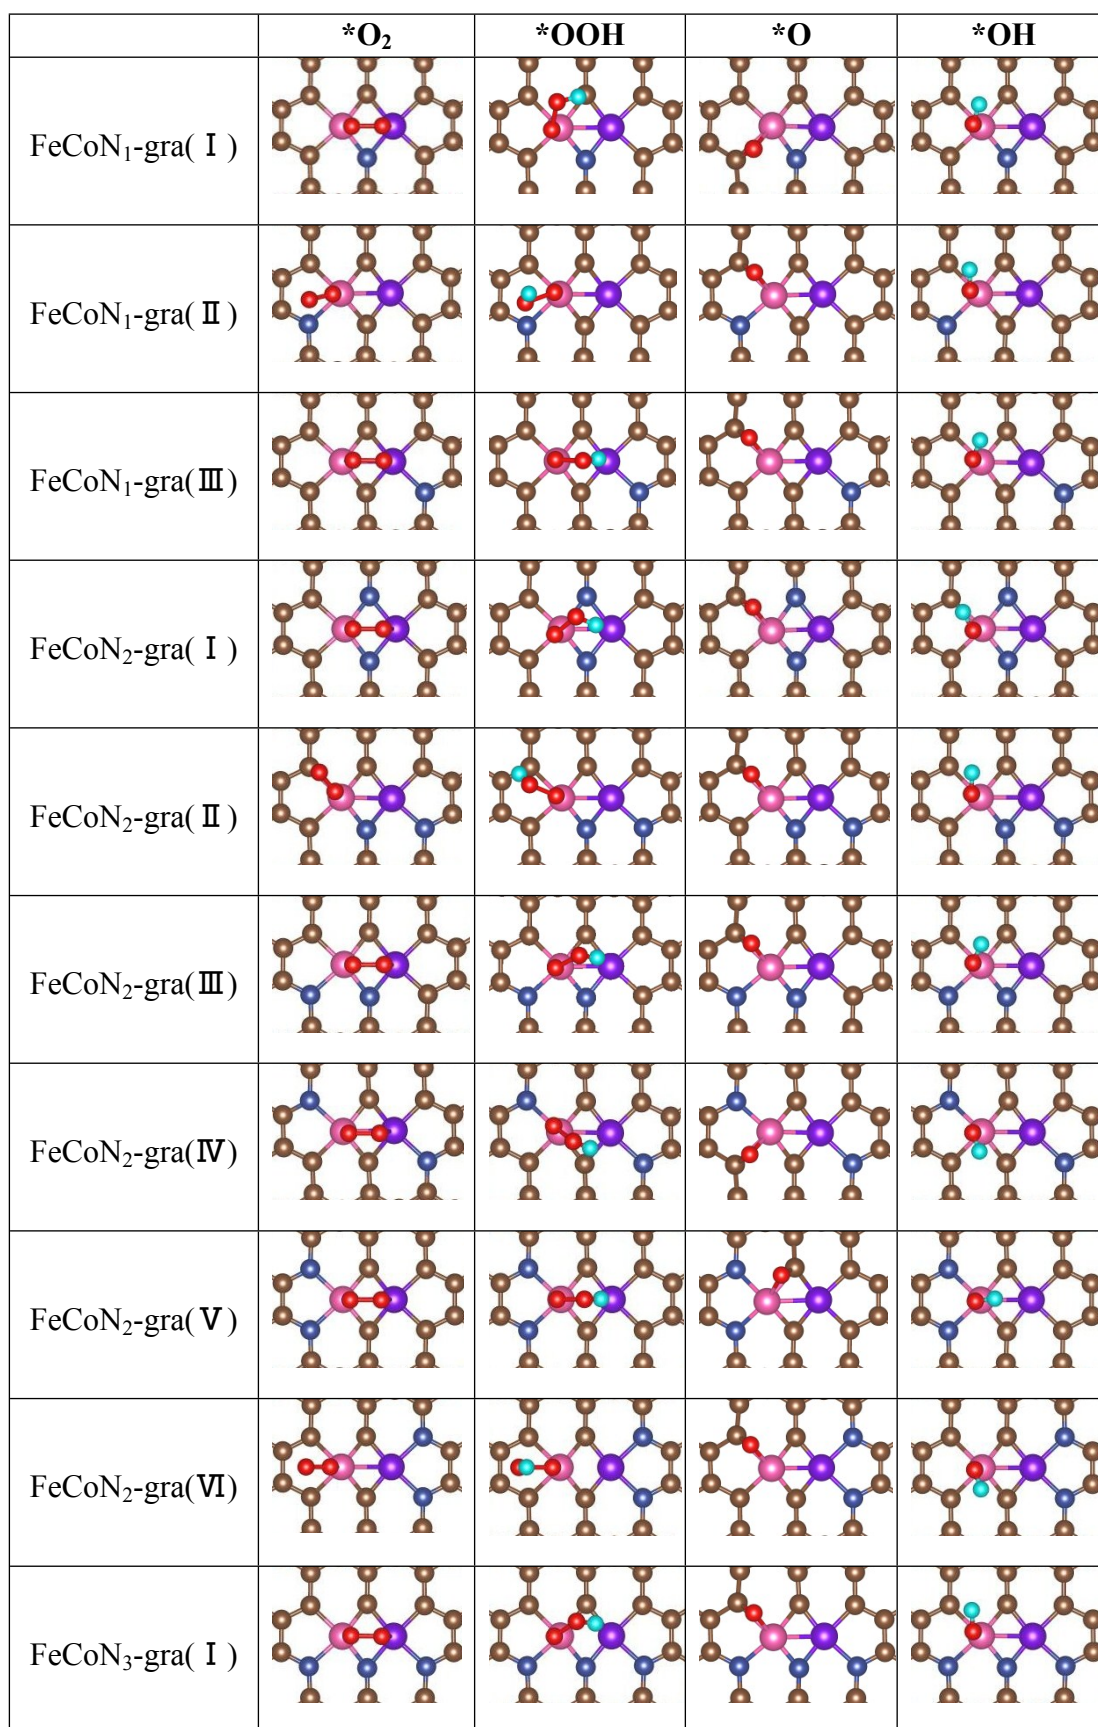

*To be continued*

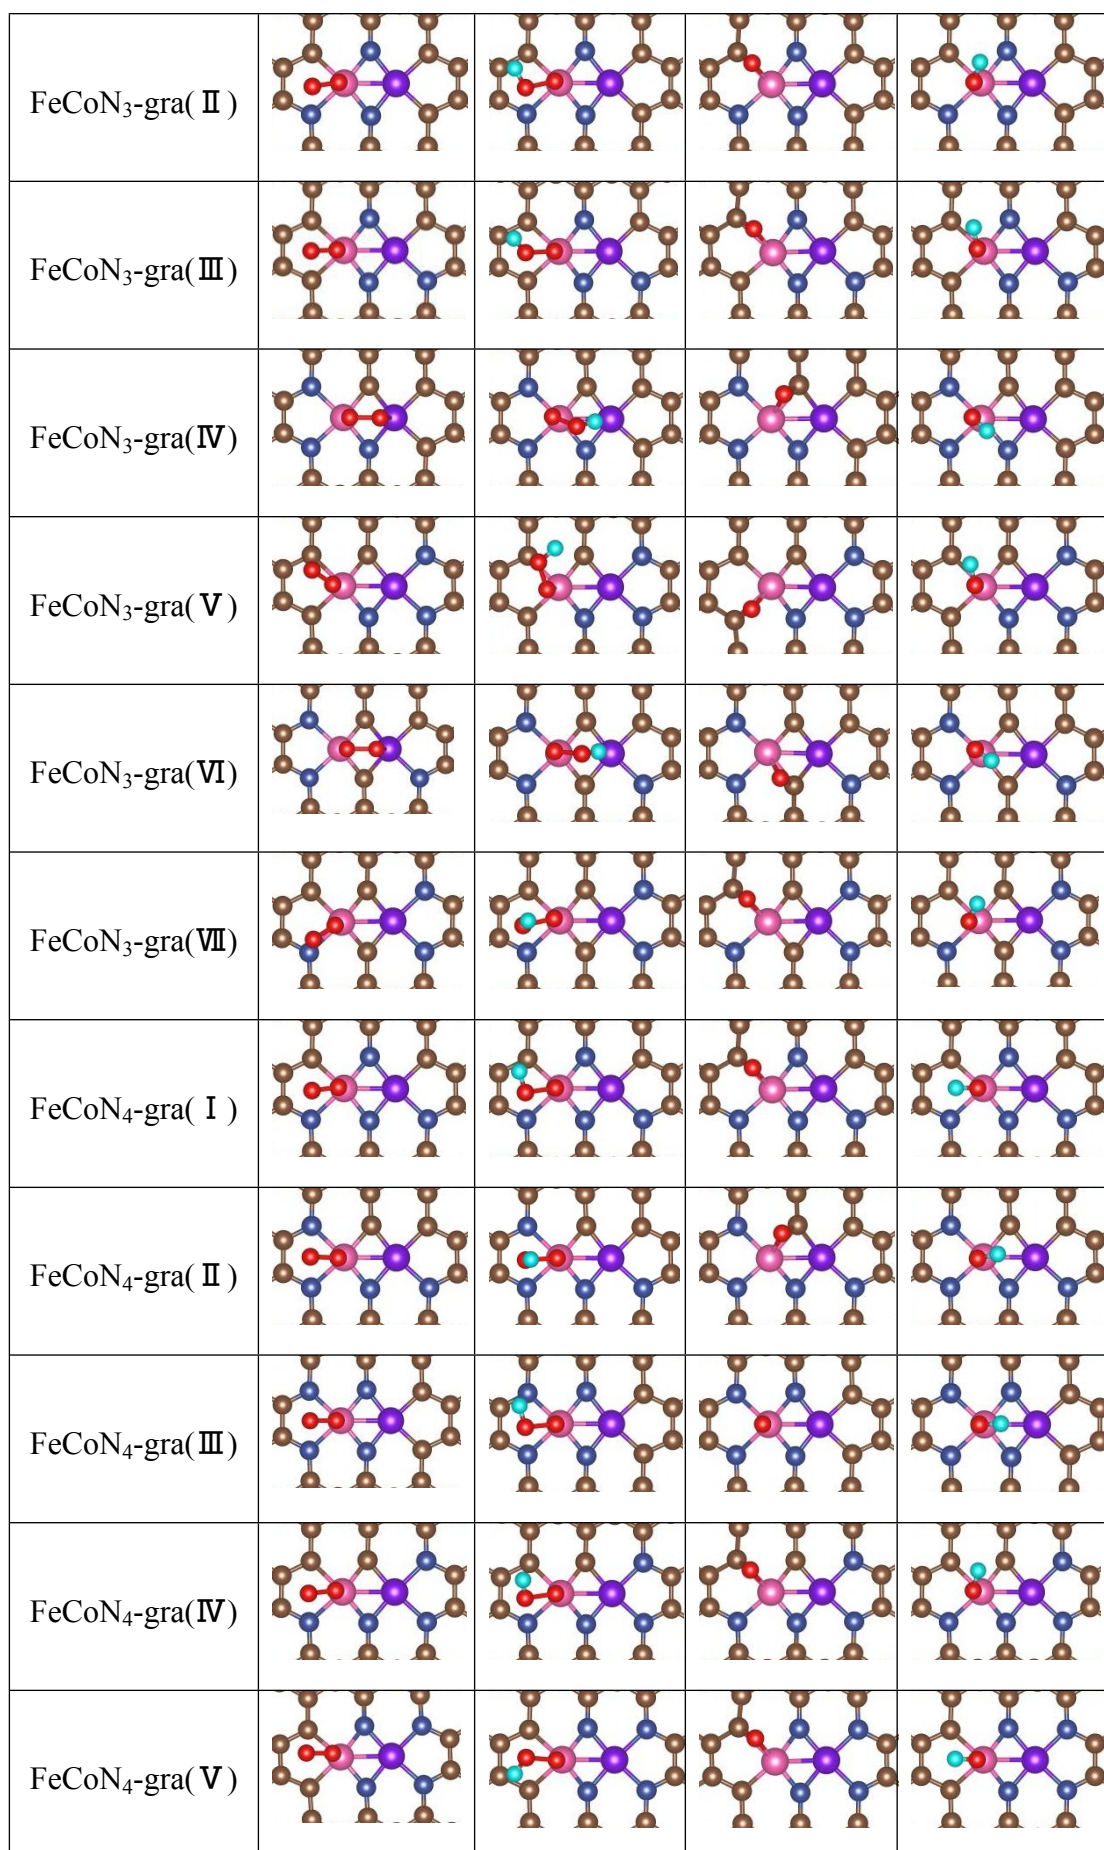

*To be continued*



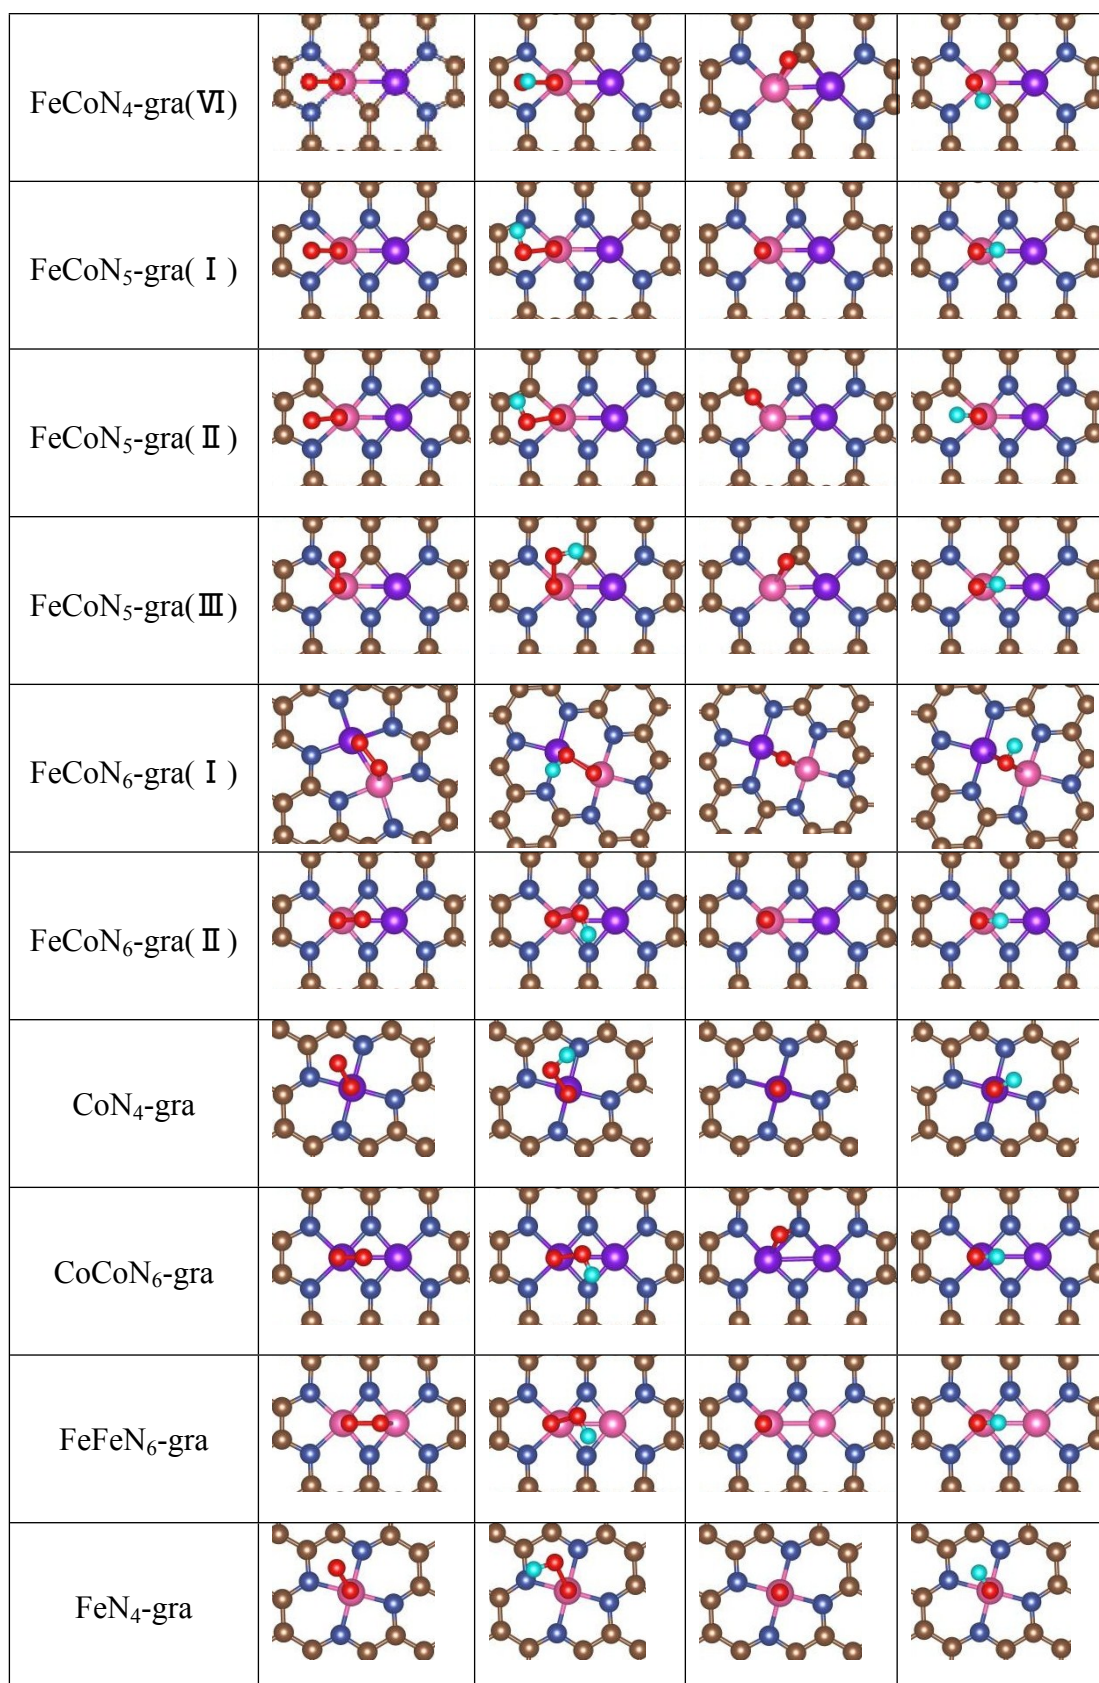

Figure S1.

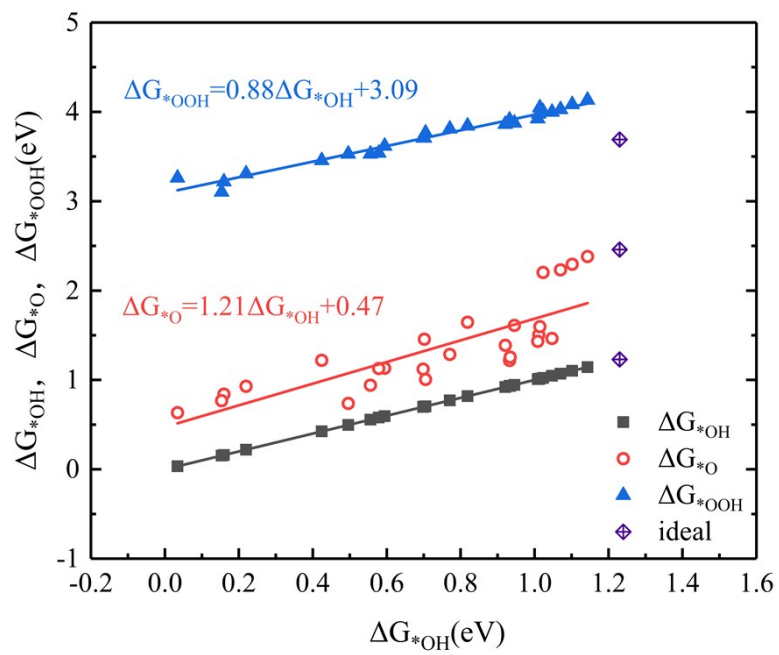

**Figure S2.**

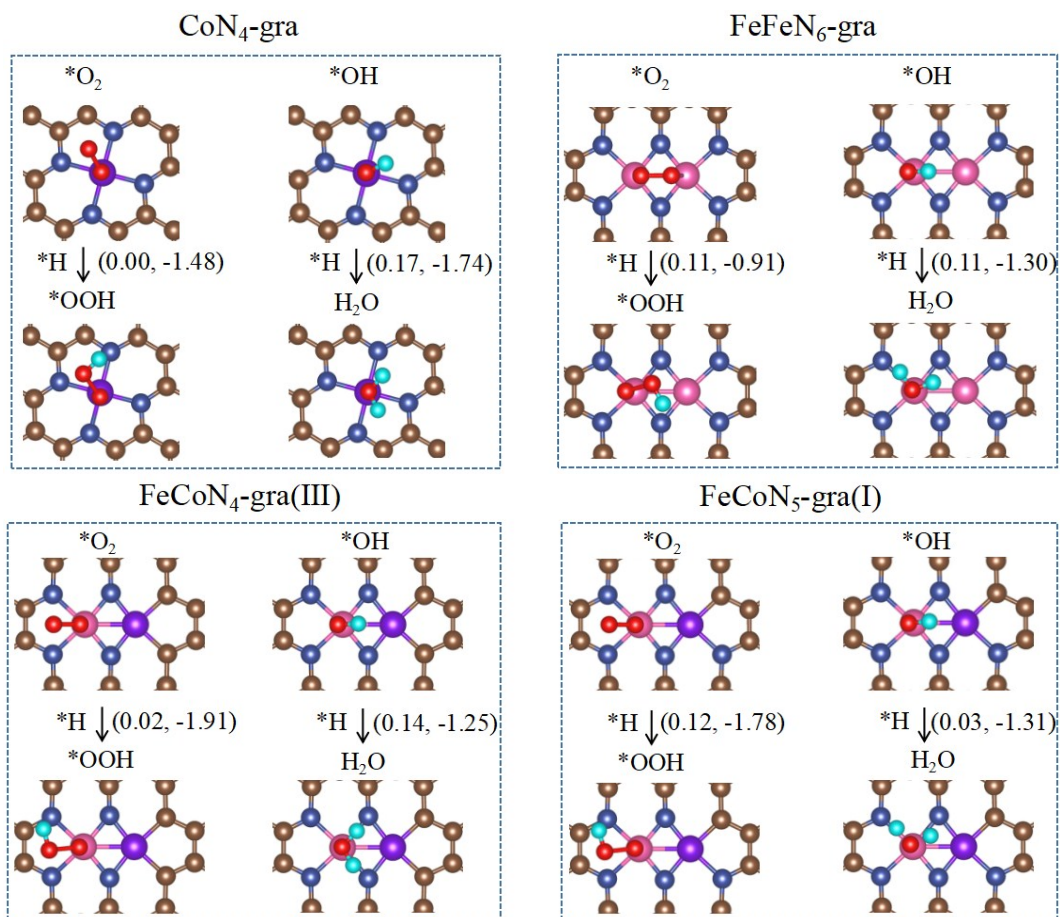

Figure S3.

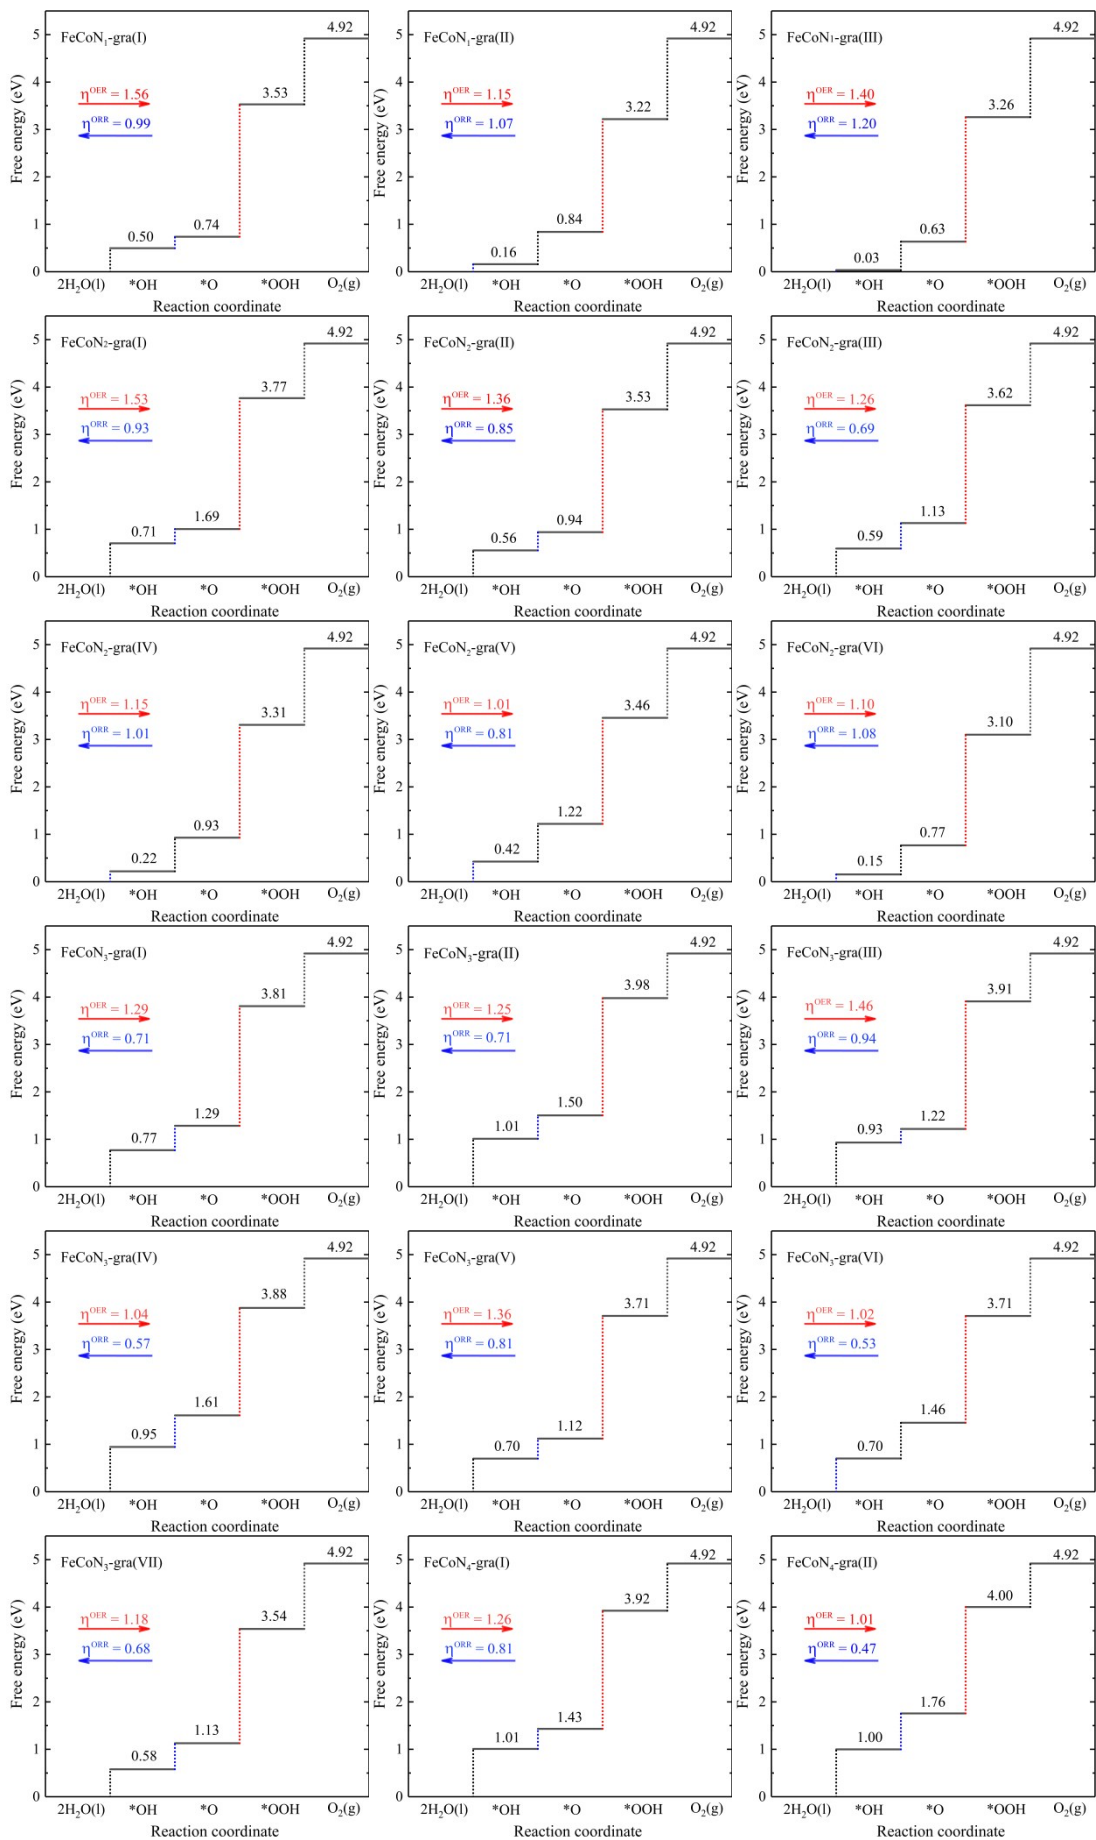

*To be continued*

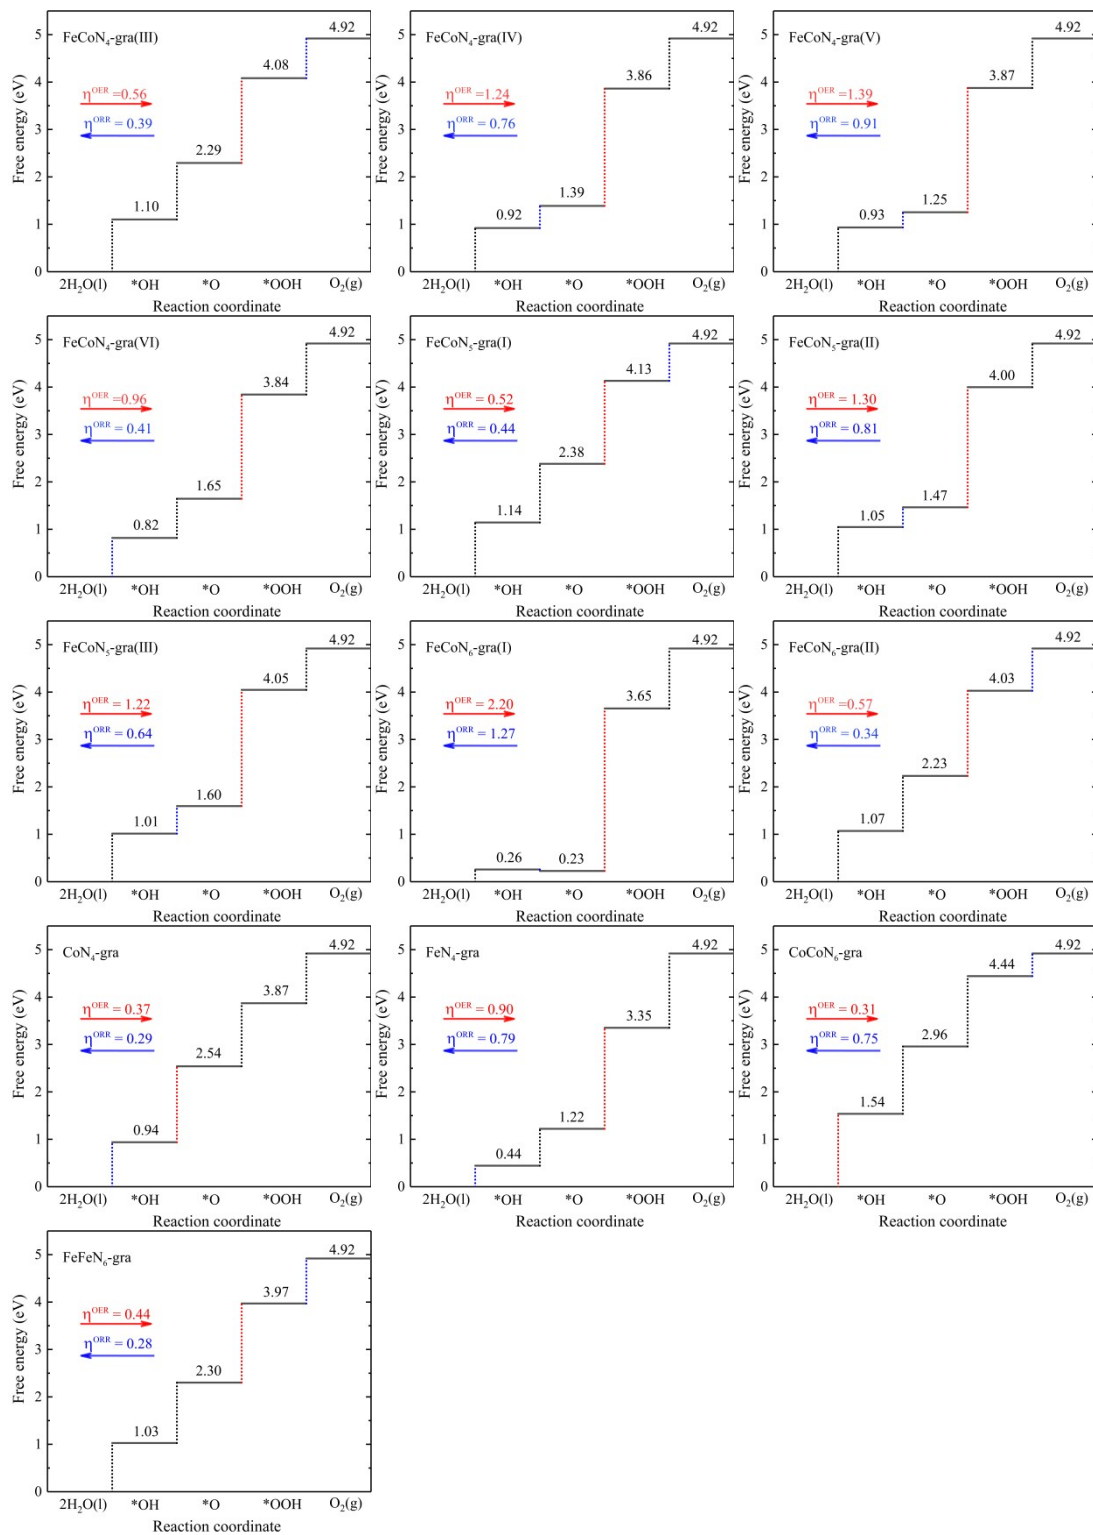

Figure S4.



**Table S1.**

|                               | $E_{\text{ads-O}_2}$ | $d_{\text{O-O}}$ | $d_{\text{Fe-O}}$ | $d_{\text{Co-O}}$ |
|-------------------------------|----------------------|------------------|-------------------|-------------------|
| FeCoN <sub>1</sub> -gra( I )  | -1.10                | 1.36             | 1.81              | 1.90              |
| FeCoN <sub>1</sub> -gra( II ) | -1.09                | 1.29             | 1.72              | -                 |
| FeCoN <sub>1</sub> -gra(III)  | -1.12                | 1.36             | 1.77              | 1.89              |
| FeCoN <sub>2</sub> -gra( I )  | -0.85                | 1.35             | 1.84              | 2.03              |
| FeCoN <sub>2</sub> -gra( II ) | -1.04                | 1.28             | 1.73              | -                 |
| FeCoN <sub>2</sub> -gra(III)  | -1.09                | 1.36             | 1.83              | 1.92              |
| FeCoN <sub>2</sub> -gra(IV)   | -1.39                | 1.37             | 1.81              | 1.90              |
| FeCoN <sub>2</sub> -gra( V )  | -1.34                | 1.38             | 1.83              | 1.89              |
| FeCoN <sub>2</sub> -gra(VI)   | -1.41                | 1.29             | 1.71              | -                 |
| FeCoN <sub>3</sub> -gra( I )  | -0.74                | 1.36             | 1.84              | 2.03              |
| FeCoN <sub>3</sub> -gra( II ) | -0.66                | 1.29             | 1.84              | -                 |
| FeCoN <sub>3</sub> -gra(III)  | -0.68                | 1.28             | 1.83              | -                 |
| FeCoN <sub>3</sub> -gra(IV)   | -0.74                | 1.36             | 1.84              | 2.00              |
| FeCoN <sub>3</sub> -gra( V )  | -0.92                | 1.29             | 1.74              | -                 |
| FeCoN <sub>3</sub> -gra(VI)   | -0.97                | 1.38             | 1.84              | 1.92              |
| FeCoN <sub>3</sub> -gra(VII)  | -1.06                | 1.29             | 1.75              | -                 |
| FeCoN <sub>4</sub> -gra( I )  | -0.72                | 1.29             | 1.86              | -                 |
| FeCoN <sub>4</sub> -gra( II ) | -0.71                | 1.29             | 1.87              | -                 |
| FeCoN <sub>4</sub> -gra(III)  | -0.64                | 1.29             | 1.89              | -                 |
| FeCoN <sub>4</sub> -gra(IV)   | -0.77                | 1.29             | 1.84              | -                 |
| FeCoN <sub>4</sub> -gra( V )  | -0.73                | 1.29             | 1.82              | -                 |
| FeCoN <sub>4</sub> -gra(VI)   | -0.79                | 1.30             | 1.84              | -                 |
| FeCoN <sub>5</sub> -gra( I )  | -0.63                | 1.29             | 1.88              | -                 |
| FeCoN <sub>5</sub> -gra( II ) | -0.60                | 1.29             | 1.79              | -                 |
| FeCoN <sub>5</sub> -gra(III)  | -0.62                | 1.29             | 1.88              | -                 |
| FeCoN <sub>6</sub> -gra( I )  | -1.60                | 1.38             | 1.86              | 1.88              |
| FeCoN <sub>6</sub> -gra( II ) | -0.62                | 1.29             | 1.88              | -                 |
| CoN <sub>4</sub> -gra         | -0.89                | 1.29             | -                 | 1.88              |
| CoCoN <sub>6</sub> -gra       | -0.19                | 1.28             | -                 | 1.99              |
| FeFeN <sub>6</sub> -gra       | -0.75                | 1.36             | 1.85, 2.10        | -                 |
| FeN <sub>4</sub> -gra         | -1.22                | 1.30             | 1.77              | -                 |

**Table S2.**

|                                | Fe   | Co    |
|--------------------------------|------|-------|
| FeCoN <sub>1</sub> -gra( I )   | 2.01 | 0.67  |
| FeCoN <sub>1</sub> -gra( II )  | 2.00 | 1.05  |
| FeCoN <sub>1</sub> -gra( III ) | 2.11 | 0.78  |
| FeCoN <sub>2</sub> -gra( I )   | 2.04 | -0.36 |
| FeCoN <sub>2</sub> -gra( II )  | 2.05 | 0.42  |
| FeCoN <sub>2</sub> -gra( III ) | 1.87 | 0.72  |
| FeCoN <sub>2</sub> -gra( IV )  | 1.94 | 0.74  |
| FeCoN <sub>2</sub> -gra( V )   | 1.82 | 1.04  |
| FeCoN <sub>2</sub> -gra( VI )  | 2.10 | 0.67  |
| FeCoN <sub>3</sub> -gra( I )   | 1.85 | 0.27  |
| FeCoN <sub>3</sub> -gra( II )  | 1.87 | -0.42 |
| FeCoN <sub>3</sub> -gra( III ) | 2.08 | -0.51 |
| FeCoN <sub>3</sub> -gra( IV )  | 1.67 | 0.61  |
| FeCoN <sub>3</sub> -gra( V )   | 2.10 | -0.12 |
| FeCoN <sub>3</sub> -gra( VI )  | 1.76 | 0.67  |
| FeCoN <sub>3</sub> -gra( VII ) | 2.00 | -0.03 |
| FeCoN <sub>4</sub> -gra( I )   | 1.85 | -0.63 |
| FeCoN <sub>4</sub> -gra( II )  | 1.39 | 0.00  |
| FeCoN <sub>4</sub> -gra( III ) | 1.35 | 0.15  |
| FeCoN <sub>4</sub> -gra( IV )  | 1.71 | -0.38 |
| FeCoN <sub>4</sub> -gra( V )   | 1.90 | -0.55 |
| FeCoN <sub>4</sub> -gra( VI )  | 1.73 | -0.29 |
| FeCoN <sub>5</sub> -gra( I )   | 1.42 | 0.40  |
| FeCoN <sub>5</sub> -gra( II )  | 1.84 | 0.12  |
| FeCoN <sub>5</sub> -gra( III ) | 1.67 | 0.18  |
| FeCoN <sub>6</sub> -gra( I )   | 2.35 | 1.04  |

Table S3.

|                                | <b>*O<sub>2</sub></b> | <b>*OOH</b> | <b>*O</b> | <b>*OH</b> |
|--------------------------------|-----------------------|-------------|-----------|------------|
| FeCoN <sub>1</sub> -gra( I )   | -444.9887             | -449.0913   | -440.8283 | -444.6682  |
| FeCoN <sub>1</sub> -gra( II )  | -444.9817             | -448.9986   | -440.3046 | -444.5913  |
| FeCoN <sub>1</sub> -gra( III ) | -445.0027             | -448.9026   | -440.4794 | -444.6373  |
| FeCoN <sub>2</sub> -gra( I )   | -445.4475             | -449.5706   | -441.2703 | -445.1821  |
| FeCoN <sub>2</sub> -gra( II )  | -445.5308             | -449.7231   | -441.2247 | -445.2241  |
| FeCoN <sub>2</sub> -gra( III ) | -445.5429             | -449.5882   | -440.9987 | -445.1495  |
| FeCoN <sub>2</sub> -gra( IV )  | -445.4373             | -449.4954   | -440.7907 | -445.1008  |
| FeCoN <sub>2</sub> -gra( V )   | -445.2953             | -449.235    | -440.3799 | -444.8115  |
| FeCoN <sub>2</sub> -gra( VI )  | -445.3107             | -449.5214   | -440.8095 | -445.0027  |
| FeCoN <sub>3</sub> -gra( I )   | -445.9511             | -450.1546   | -441.6033 | -445.7422  |
| FeCoN <sub>3</sub> -gra( II )  | -445.8613             | -449.9847   | -441.3761 | -445.4717  |
| FeCoN <sub>3</sub> -gra( III ) | -445.8379             | -450.0259   | -441.6260 | -445.5249  |
| FeCoN <sub>3</sub> -gra( IV )  | -445.7066             | -449.8240   | -441.0029 | -445.3231  |
| FeCoN <sub>3</sub> -gra( V )   | -445.8214             | -449.9101   | -441.4557 | -445.5022  |
| FeCoN <sub>3</sub> -gra( VI )  | -445.6639             | -449.7295   | -440.8856 | -445.2911  |
| FeCoN <sub>3</sub> -gra( VII ) | -445.7206             | -449.8607   | -441.2117 | -445.4396  |
| FeCoN <sub>4</sub> -gra( I )   | -446.2963             | -450.4039   | -441.8188 | -445.8696  |
| FeCoN <sub>4</sub> -gra( II )  | -446.2242             | -450.2846   | -441.4058 | -445.8171  |
| FeCoN <sub>4</sub> -gra( III ) | -446.1189             | -450.1699   | -440.7930 | -445.6828  |
| FeCoN <sub>4</sub> -gra( IV )  | -446.1977             | -450.3155   | -441.7177 | -445.7967  |
| FeCoN <sub>4</sub> -gra( V )   | -446.0546             | -450.2221   | -441.7497 | -445.6985  |
| FeCoN <sub>4</sub> -gra( VI )  | -445.9080             | -450.0031   | -441.1231 | -445.5956  |
| FeCoN <sub>5</sub> -gra( I )   | -446.4062             | -450.42215  | -440.9952 | -445.9304  |
| FeCoN <sub>5</sub> -gra( II )  | -446.3158             | -450.4321   | -441.8741 | -445.9141  |
| FeCoN <sub>5</sub> -gra( III ) | -446.2639             | -450.3587   | -441.6863 | -445.9215  |
| FeCoN <sub>6</sub> -gra( I )   | -445.9368             | -449.4509   | -441.7595 | -445.4090  |
| FeCoN <sub>6</sub> -gra( II )  | -446.4121             | -450.4443   | -441.0717 | -445.9417  |
| CoN <sub>4</sub> -gra          | -458.7990             | -462.7659   | -452.9111 | -458.2405  |
| CoCoN <sub>6</sub> -gra        | -444.2073             | -448.3234   | -438.7217 | -443.7586  |
| FeFeN <sub>6</sub> -gra        | -447.9625             | -451.9855   | -442.512  | -447.4729  |
| FeN <sub>4</sub> -gra          | -460.2559             | -464.4192   | -455.4095 | -459.8889  |
